# Supplementary material for: Improving Surfactin Production in Bacillus subtilis 168 by Metabolic Engineering
Source: MDPI journal article supplement (doi:10.3390/microorganisms12050998), 2024-05-15
Supplement: s1 [file s1]

## Supplementary Materials

### Improving Surfactin Production in *Bacillus subtilis* 168 by Metabolic Engineering

Zihao Guo <sup>1</sup>, Jiuyu Sun <sup>1</sup>, Qinyuan Ma <sup>1</sup>, Mengqi Li <sup>1</sup>, Yamin Dou <sup>1</sup>, Shaomei Yang <sup>1,\*</sup>, Xiuzhen Gao <sup>1,\*</sup>

<sup>1</sup> *School of Life Sciences and Medicine, Shandong University of Technology, 266 Xincun West Road, Zibo 255049, China*

\* Correspondence: shaomei@sdut.edu.cn; gaoxz@sdut.edu.cn

**A**

ATGAAGATTTACGGAATTTATATGGACCGCCCGCTTTCACAGGAAGAAAATGAACGGTTCATGTCTTTCATATC  
ACCTGAAAAACGGGAGAAATGCCGGAGATTTTATCATAAAGAAGATGCTCACCGCACCCTGCTGGGAGATGT  
GCTCGTTCGCTCAGTCATAAGCAGGCAGTATCAGTTGGACAAATCCGATATCCGCTTTAGCACGCAGGAATAC  
GGGAAGCCGTGCATCCCTGATCTTCCCGACGCTCATTTCACATTCTCACTCCGGACGCTGGGTCATTGCGC  
GTTTGATTACAGCCGATCGGCATAGATATCGAAAAACGAAACCGATCAGCCTTGAGATCGCCAAGCGCTTC  
TTTTCAAAAACAGAGTACAGCGACCTTTTAGCAAAAGACAAGGACGAGCAGACAGACTATTTTATCATCTAT  
GGTCAATGAAAGAAAGCTTTATCAAACAAGGAAGGCAAAGGCTTATCGCTTCCGCTTGAATTCCTTTTCAGTGC  
GCCTGCACCAGGACGGACAAGTATCCATTGAGCTTCCGGACAGCCATTCCCCATGCTATATCAAAACGTATGA  
GGTCGATCCCGGCTACAAAATGGCTGTATGCGCCGTACACCCTGATTCCCCGAGGATATCACAATGGTCTCGT  
ACGAAGAGCTTTTATTAATA

**B**

ATGAAGATTTACGGAATTTATATGGACCGCCCGCTTTCACAGGAAGAAAATGAACGGTTCATGTCTTTCATATC  
ACCTGAAAAACGGGAGAAATGCCGGAGATTTTATCATAAAGAAGATGCTCACCGCACCCTGCTGGGAGATGT  
GCTCGTTCGCTCAGTCATAAGCAGGCAGTATCAGTTGGACAAATCCGATATCCGCTTTAGCACGCAGGAATAC  
GGGAAGCCGTGCATCCCTGATCTTCCCGACGCTCATTTCACATTCTCACTCCGGACGCTGGGTCATTGCGC  
GTTTGATTACAGCCGATCGGCATAGATATCGAAAAACGAAACCGATCAGCCTTGAGATCGCCAAGCGCTTC  
TTTTCAAAAACAGAGTACAGCGACCTTTTAGCAAAAGACAAGGACGAGCAGACAGACTATTTTATCATCTAT  
GGTCAATGAAAGAAAGCTTTATCAAACAAGGAAGGCAAAGGCTTATCGCTTCCGCTTGAATTCCTTTTCAGTGC  
CCTGCACCAGGACGGACAAGTATCCATTGAGCTTCCGGACAGCCATTCCCCATGCTATATCAAAACGTATGAG  
GTCGATCCCGGCTACAAAATGGCTGTATGCGCCGTACACCCTGATTCCCCGAGGATATCACAATGGTCTCGTA  
CGAAGAGCTTTTATTAATA

**Figure S1.** Nucleotide sequences of the *sfp* gene in *Bacillus subtilis*. **(A)** Nucleotide sequence of the inactive pseudogene *sfp* in wild-type *B. subtilis* 168. **(B)** Nucleotide sequence of the active *sfp* gene.

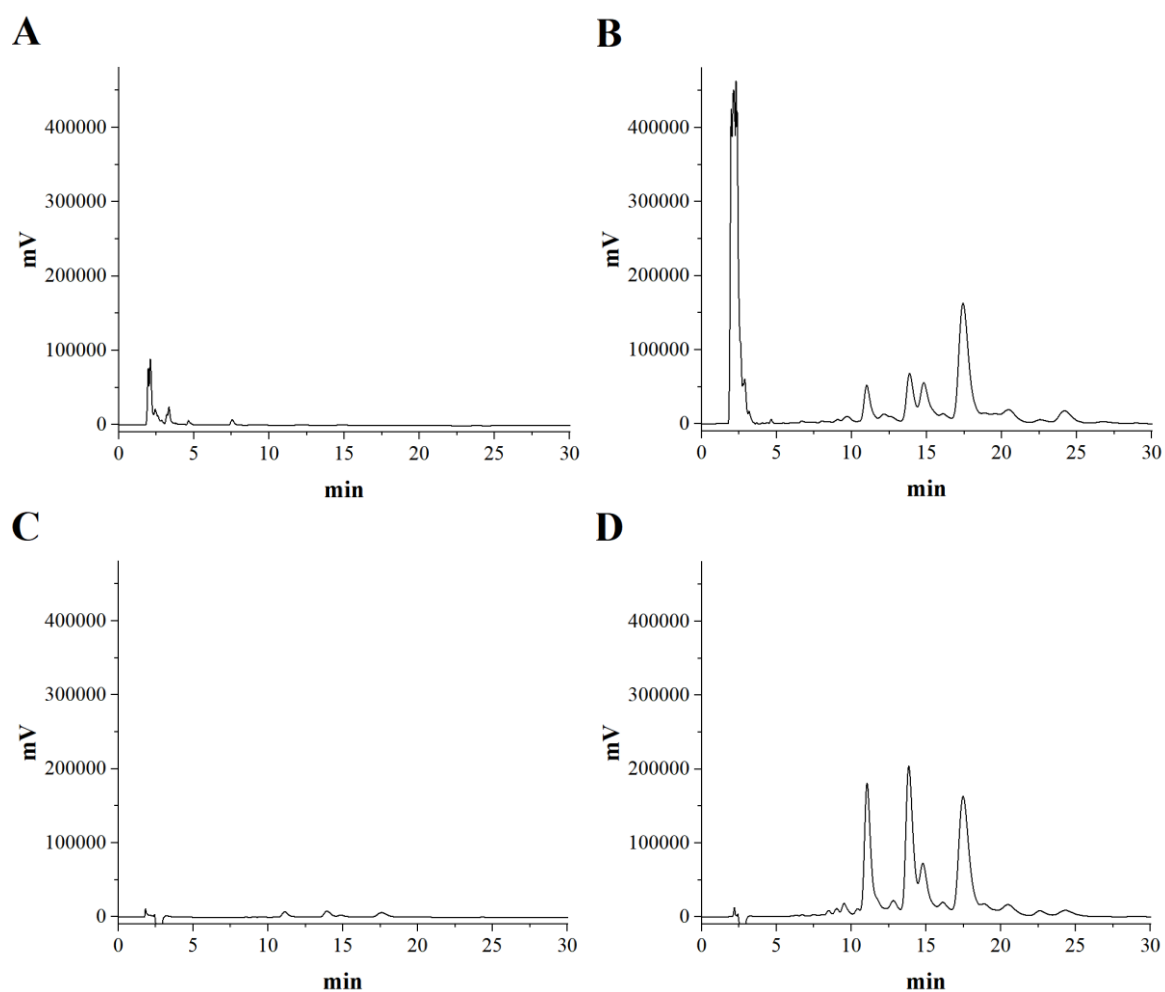

**Figure S2.** HPLC profiles of the samples and standards. **(A)** HPLC profile of the supernatant of wild-type *B. subtilis* 168 fermented for 48 h, concentrated 4-fold after treatment. **(B)** HPLC profile of the supernatant of recombinant strain BSSF2 fermented for 48 h, concentrated 4-fold after treatment. **(C)** HPLC profile of the 0.2 g/L surfactin standard. **(D)** HPLC profile of the 5.0 g/L surfactin standard.

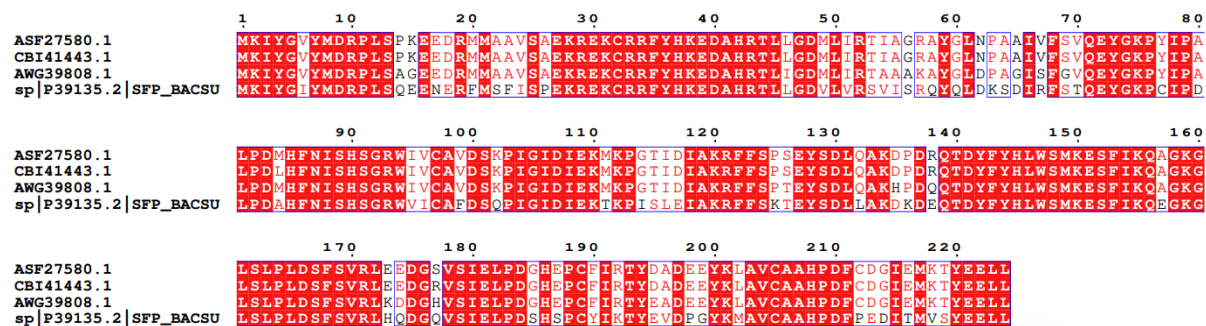

**Figure S3.** Alignment results of the amino acid sequences of PPTase from different sources. GenBank:

ASF27580.1, PPTase from *Bacillus amyloliquefaciens* MT45; GenBank: CBI41443.1, PPTase from *Bacillus amyloliquefaciens* DSM7; GenBank: AWG39808.1, PPTase from *Bacillus velezensis* BS-37 DSM7; GenBank: P39135.2, active PPTase from *Bacillus subtilis* 168.

```

      1      10      20      30      40      50      60      70      80
AIG20548.1  MKTIDSKGLLGNRVYLQVFSAYSILMLGVFIDMLAIMTIVGFWEVDPTMTGLFPVAYALPGITFGSWAGVIADRFRRKIP
CAL0278229.1  ...MEKPLFRNQKGLMTLLASQTISSLGDWLHLLAVLTLAFAQLHASPLDMSLLMSFALPVTLGPVSGLLADRFDRKT

      90      100      110      120      130      140      150      160
AIG20548.1  IMMFCNLMVGLITITALLFVODIHWLLVALMIRSLFIVFYPAQQTLTRQIVSPDLTKKAVSINCIIVEGCTKIVGPLIGGM
CAL0278229.1  IMFLSEIIGRALTTVLSGVVSELWQLYVELSVQSCFSSLELPAGKNGKLELAPEAHIQOAVSVSSIIDNSSKIFGPALGGT

      170      180      190      200      210      220      230      240
AIG20548.1  LLSWFOPEFCLIMRAISCLLATLVLIPTIKFKETISKEFVEKOKOSTWTAWVOCWSYVLSNRITLSTMTIFVTIAMAVLQIL
CAL0278229.1  LIAAFSIHSVFYINAGAFFLSAVILFFLPKRDALFLOKANTPQEKTAALTSTIKECLQFLKRMPLLLTGLLTACVVLFFVQLI

      250      260      270      280      290      300      310
AIG20548.1  VDSGFPTLFLKSLFPHDKSKMGYIITSIIIGGILGALLTKLKQFOYGRVVCGGMVLMGTFGGIGLITFS..TVFVLLAYL
CAL0278229.1  GDSGAIIILIRSFSGAPPELAGWCMAVSCAGMLLTAATGRRRITSYLLYFSAGTLILLGLATGGAPFLSGMGIAGITLFFIF

      320      330      340      350      360      370      380      390
AIG20548.1  ISFIACIGSGGLMLVSNQVILQIESDQDQVGRVFCIQSSTNAVLIISPAMSGLVHLFCVTLQLYVYGCVGLVIGVIGVS
CAL0278229.1  AFIIMGAAPGLVHLIPQILVQTTVPVDYSGRVFGAIQSATTLASILGMAAGGVLAEWIGVSLAFLVCCLLIMIGLIITLI

      400      410
AIG20548.1  LQKYLWAKHKHEPIRANNF..
CAL0278229.1  GKRIAESRRYLVTKSNKGAQG

```

**Figure S4.** Alignment results of the amino acid sequences of KrsE from *Bacillus thuringiensis* (GenBank:

AIG20548.1) and YfiS of *B. subtilis* 168 (GenBank: CAL0278229.1).

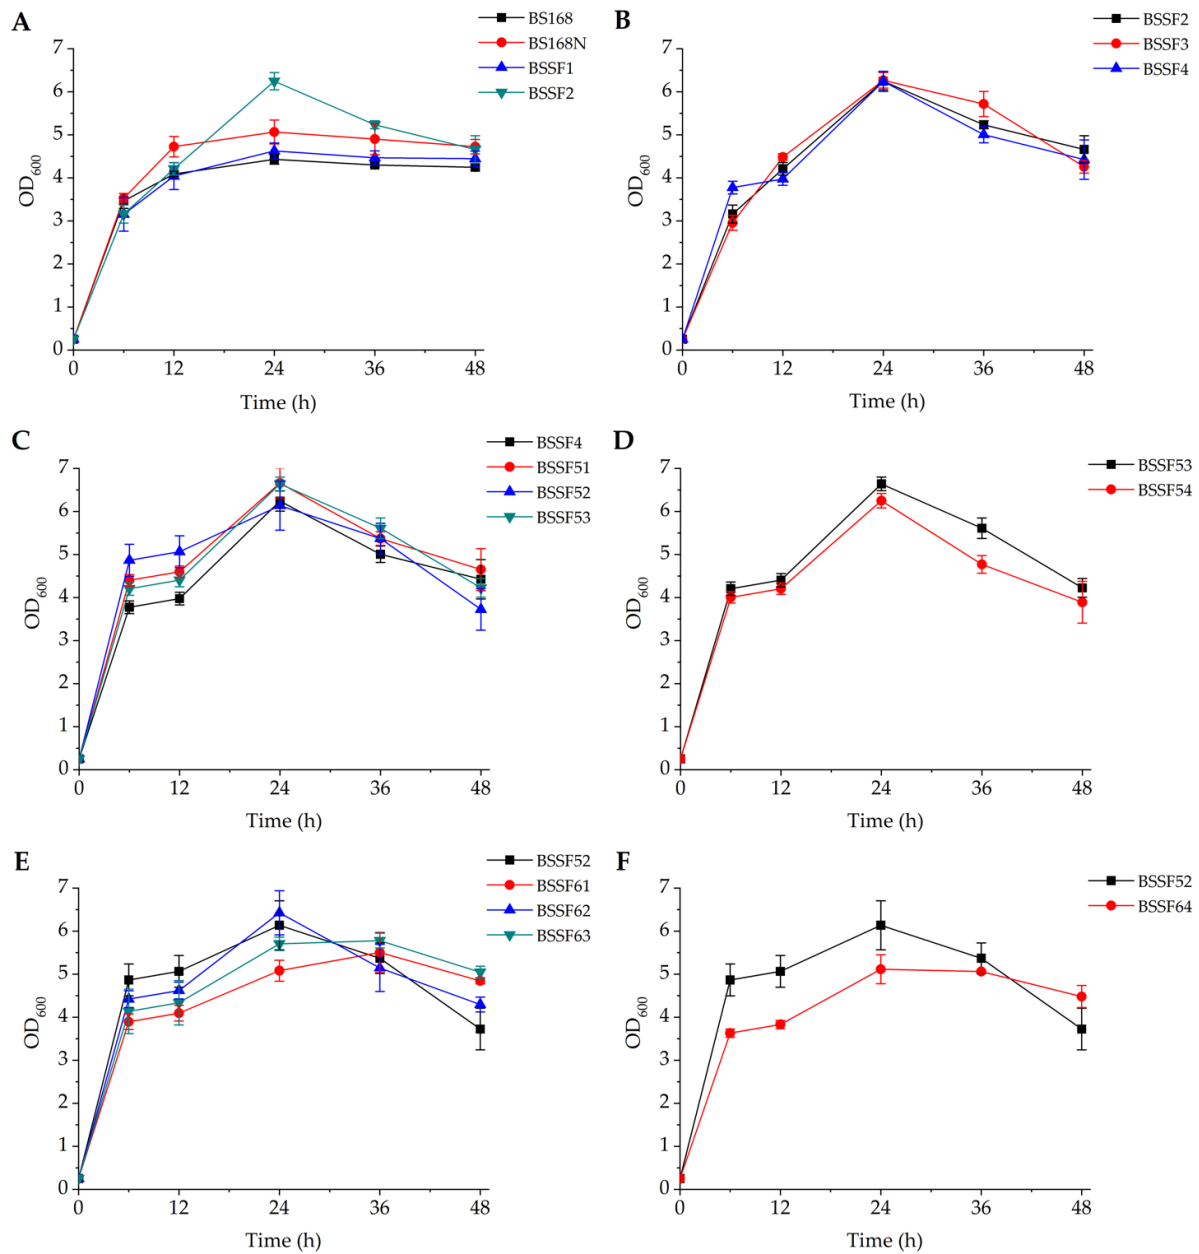

**Figure S5.** Effects of different gene modifications on bacterial growth. **(A)** Growth curves of wild-type *Bacillus subtilis* 168 (BS168), parental strain BS168N, *yrpC* gene knockout strain BSSF1 and *sfp* gene overexpression strain BSSF2. **(B)** Growth curves of control strain BSSF2, *pssD* gene knockout strain BSSF3 and *yvkC* gene knockout strain BSSF4. **(C)** Growth curves of control strain BSSF4, *yerP* gene overexpression strain BSSF51, *yfiS* gene overexpression strain BSSF52 and *ycxA* gene overexpression strain BSSF53. **(D)** Growth curves of control strain BSSF53 and *ycxA-efp* gene overexpression strain BSSF54. **(E)** Growth curves of control strain BSSF52 and strains BSSF61, BSSF62 and BSSF63 obtained by replacing

the native promoter of the *srfA* operon with promoters  $P_{HpaII}$ ,  $P_{43}$  and  $P_{SB}$ , respectively. (F) Growth curves of control strain BSSF52 and *codY* gene knockout strain BSSF64.
